# Supplementary material for: Genetic variation in P-element dysgenic sterility is associated with double-strand break repair and alternative splicing of TE transcripts
Source: PLoS Genet. 2022 Dec 7;18(12):e1010080. doi: 10.1371/journal.pgen.1010080 (PMC9762592; doi:10.1371/journal.pgen.1010080)
Supplement: S18 Table — (XLS) [file pgen.1010080.s024.xls]

## Sheet: F2data
Isogenic Strain	F1 Fertility	No. of F2 offspring	Genotype
Fertile_B81	Sterile	0	Fertile
Fertile_B81	Sterile	0	Fertile
Fertile_B81	Sterile	0	Fertile
Fertile_B81	Sterile	0	Fertile
Fertile_B81	Sterile	0	Fertile
Fertile_B81	Sterile	0	Fertile
Fertile_B81	Sterile	0	Fertile
Fertile_B81	Sterile	0	Fertile
Fertile_B81	Fertile	58	Fertile
Fertile_B81	Fertile	65	Fertile
Fertile_B81	Sterile	0	Fertile
Fertile_B81	Sterile	0	Fertile
Fertile_B81	Sterile	0	Fertile
Fertile_B81	Sterile	0	Fertile
Fertile_B81	Sterile	0	Fertile
Fertile_B81	Fertile	24	Fertile
Fertile_B81	Fertile	90	Fertile
Fertile_B81	Fertile	29	Fertile
Fertile_B81	Sterile	0	Fertile
Fertile_B81	Sterile	0	Fertile
Fertile_B81	Sterile	0	Fertile
Fertile_B81	Sterile	0	Fertile
Fertile_B81	Sterile	0	Fertile
Fertile_B81	Fertile	45	Fertile
Fertile_B81	Fertile	98	Fertile
Fertile_B81	Sterile	0	Fertile
Fertile_B81	Fertile	23	Fertile
Fertile_B81	Sterile	0	Fertile
Fertile_B82	Fertile	62	Fertile
Fertile_B82	Fertile	73	Fertile
Fertile_B82	Fertile	5	Fertile
Fertile_B82	Sterile	0	Fertile
Fertile_B82	Sterile	0	Fertile
Fertile_B82	Sterile	0	Fertile
Fertile_B82	Sterile	0	Fertile
Fertile_B82	Sterile	0	Fertile
Fertile_B82	Sterile	0	Fertile
Fertile_B82	Sterile	0	Fertile
Fertile_B82	Sterile	0	Fertile
Fertile_B82	Sterile	0	Fertile
Fertile_B82	Sterile	0	Fertile
Fertile_B82	Sterile	0	Fertile
Fertile_B82	Sterile	0	Fertile
Fertile_B82	Sterile	0	Fertile
Fertile_B82	Sterile	0	Fertile
Fertile_B82	Sterile	0	Fertile
Fertile_B82	Sterile	0	Fertile
Fertile_B82	Sterile	0	Fertile
Fertile_B82	Fertile	5	Fertile
Fertile_B82	Sterile	0	Fertile
Fertile_B82	Sterile	0	Fertile
Fertile_B82	Sterile	0	Fertile
Fertile_B82	Sterile	0	Fertile
Fertile_B82	Sterile	0	Fertile
Fertile_B82	Sterile	0	Fertile
Fertile_B82	Sterile	0	Fertile
Fertile_B82	Sterile	0	Fertile
Fertile_B82	Sterile	0	Fertile
Fertile_B82	Sterile	0	Fertile
Sterile_B63	Sterile	0	Sterile
Sterile_B63	Sterile	0	Sterile
Sterile_B63	Sterile	0	Sterile
Sterile_B63	Sterile	0	Sterile
Sterile_B63	Sterile	0	Sterile
Sterile_B63	Sterile	0	Sterile
Sterile_B63	Sterile	0	Sterile
Sterile_B63	Sterile	0	Sterile
Sterile_B63	Sterile	0	Sterile
Sterile_B63	Sterile	0	Sterile
Sterile_B63	Sterile	0	Sterile
Sterile_B63	Sterile	0	Sterile
Sterile_B63	Sterile	0	Sterile
Sterile_B63	Sterile	0	Sterile
Sterile_B63	Sterile	0	Sterile
Sterile_B63	Sterile	0	Sterile
Sterile_B63	Sterile	0	Sterile
Sterile_B63	Sterile	0	Sterile
Sterile_B63	Sterile	0	Sterile
Sterile_B63	Sterile	0	Sterile
Sterile_B63	Sterile	0	Sterile
Sterile_B63	Sterile	0	Sterile
Sterile_B63	Sterile	0	Sterile
Sterile_B63	Sterile	0	Sterile
Sterile_B63	Sterile	0	Sterile
Sterile_B63	Sterile	0	Sterile
Sterile_B63	Sterile	0	Sterile
Sterile_B63	Sterile	0	Sterile
Sterile_B63	Sterile	0	Sterile
Sterile_B63	Sterile	0	Sterile
Sterile_B63	Sterile	0	Sterile
Sterile_B63	Sterile	0	Sterile
Sterile_B62	Sterile	0	Sterile
Sterile_B62	Sterile	0	Sterile
Sterile_B62	Sterile	0	Sterile
Sterile_B62	Sterile	0	Sterile
Sterile_B62	Sterile	0	Sterile
Sterile_B62	Sterile	0	Sterile
Sterile_B62	Sterile	0	Sterile
Sterile_B62	Sterile	0	Sterile
Sterile_B62	Sterile	0	Sterile
Sterile_B62	Sterile	0	Sterile
Sterile_B62	Sterile	0	Sterile
Sterile_B62	Sterile	0	Sterile
Sterile_B62	Sterile	0	Sterile
Sterile_B62	Sterile	0	Sterile
Sterile_B62	Sterile	0	Sterile
Sterile_B62	Sterile	0	Sterile
Sterile_B62	Sterile	0	Sterile
Sterile_B62	Sterile	0	Sterile
Sterile_B62	Sterile	0	Sterile
Sterile_B62	Sterile	0	Sterile
Sterile_B62	Sterile	0	Sterile
Sterile_B62	Sterile	0	Sterile
Sterile_B62	Sterile	0	Sterile
Sterile_B62	Sterile	0	Sterile
Sterile_B62	Sterile	0	Sterile
Supplemental table S18: Fertility of F1 females from crosses between isogenic Fertile/Sterile lines and Harwich males. Fertile_B81/B82 and Sterile_B61/B62 are the isogenic lines either carrying Fertile (B8) allele or Sterile (B6) allele in the QTL region but in an otherwise similar genetic backgroud.
